# Supplementary material for: Matrix effects on the performance and mechanism of Hg removal from groundwater by MoS2 nanosheets
Source: Royal Society of Chemistry journal article supplement (doi:10.1039/d1va00035g), 2022-01-01
Supplement: d1va00035g1.pdf [file d1va00035g1.pdf]

Supplementary Information for

## **Matrix Effects on the Performance and Mechanism of Hg Removal from Groundwater by MoS<sub>2</sub> Nanosheets**

Mengxia Wang<sup>a</sup>, Qi Han,<sup>a</sup> Yufei Shu,<sup>a</sup> Kunkun Wang,<sup>a</sup> Li Wang,<sup>a</sup>

Bei Liu,<sup>a</sup> Ines Zucker,<sup>b</sup> and Zhongying Wang<sup>a\*</sup>

<sup>a</sup> State Environmental Protection Key Laboratory of Integrated Surface Water-Groundwater Pollution Control, Guangdong Provincial Key Laboratory of Soil and Groundwater Pollution Control, School of Environmental Science and Engineering Southern University of Science and Technology, Shenzhen 518055, China

<sup>b</sup> Porter School of Environmental Studies and School of Mechanical Engineering,

Tel Aviv University, 69978, Israel

---

\* to whom correspondence should be addressed. e-mail: [wangzy6@sustech.edu.cn](mailto:wangzy6@sustech.edu.cn); tel.: +86-075588018040;

## Table of Contents

| Supplementary | Contents                                                                                  | Page number |
|---------------|-------------------------------------------------------------------------------------------|-------------|
| Table S1      | The corresponding fitting parameters of kinetic models                                    | 5           |
| Table S2      | The corresponding fitting parameters of isotherm models                                   | 5           |
| Table S3      | The Hg removal capacities of different materials                                          | 5           |
| Figure S1     | Schematic illustration of the chemical exfoliation of bulk MoS <sub>2</sub>               | 6           |
| Figure S2     | Particle size distribution of as-exfoliated MoS <sub>2</sub> nanosheets                   | 6           |
| Figure S3     | S 2p XPS spectra of as-prepared MoS <sub>2</sub> nanosheets                               | 6           |
| Figure S4     | Hg uptake kinetics by MoS <sub>2</sub> nanosheets in groundwater                          | 7           |
| Figure S5     | Fitting of Hg uptake kinetics by MoS <sub>2</sub> nanosheets                              | 7           |
| Figure S6     | Determination of MoO <sub>4</sub> <sup>2-</sup> in solution by Ion Chromatography.        | 8           |
| Figure S7     | Ca <sup>2+</sup> and Mg <sup>2+</sup> uptake by MoS <sub>2</sub> nanosheets               | 8           |
| Figure S8     | The XPS survey scan spectra of Hg-laden MoS <sub>2</sub>                                  | 9           |
| Figure S9     | TEM images and EDS-mapping of Hg-laden MoS <sub>2</sub> nanosheets formed in groundwater. | 9           |
| Figure S10    | TEM images and EDS-mapping of Hg-laden MoS <sub>2</sub> nanosheets formed in DI water.    | 10          |
| Figure S11    | Mass distribution of Mo in (a) groundwater and (b) DI water.                              | 10          |
| Figure S12    | Oxidation of MoS <sub>2</sub> in presence of Cl <sup>-</sup> at various concentrations    | 11          |
| Figure S13    | The percentage of Hg species in simulated groundwater at pH 8                             | 11          |
| Figure S14    | Effects of pH on Hg removal efficiency by MoS <sub>2</sub>                                | 12          |
| Figure S15    | Hg uptake by AC in the groundwater                                                        | 12          |

## Materials

All chemicals used in this study were of analytical grade or higher. Sodium sulfate ( $\text{Na}_2\text{SO}_4$ ) and sodium bicarbonate ( $\text{NaHCO}_3$ ) were obtained from Linfeng Chemical Reagent Technology (Shanghai, China). Mercury nitrate ( $\text{Hg}(\text{NO}_3)_2 \cdot \text{H}_2\text{O}$ ) was purchased from Macklin Chemical Reagent Technology (Shanghai, China). Calcium chloride anhydrous ( $\text{CaCl}_2$ ) and sodium chloride ( $\text{NaCl}$ ) were obtained from Guoyao Chemical Reagent Corporation (Shanghai, China).

## Sorption kinetic and isotherm models

The commonly used pseudo-first-order (**Eq. (1)**) and pseudo-second-order (**Eq. (2)**) kinetic models were employed to evaluate the controlling of kinetic mechanism of adsorption process, and the relative model equations are presented in the following:<sup>1</sup>

$$\ln(q_e - q_t) = \ln q_e - K_1 t \quad (1)$$

$$\frac{t}{q_t} = \frac{1}{K_2 q_e^2} + \frac{t}{q_e} \quad (2)$$

where  $q_t$  and  $q_e$  (mg/g) represent the Hg uptake at time  $t$  (h) and equilibrium, respectively;  $K_1$  and  $K_2$  are pseudo-first-order and pseudo-second-order sorption rate constants, respectively.

The isotherm data was fitted with the classical Langmuir (**Eq. (3)**) model and Freundlich model (**Eq. (4)**):

$$q_e = \frac{q_m K_L C_e}{1 + K_L C_e} \quad (3)$$

$$q_e = K_F C_e^{\frac{1}{n}} \quad (4)$$

where  $q_e$  (mg/g) and  $C_e$  (mg/L) are the equilibrium Hg uptake and the equilibrium Hg concentration,  $q_m$  (mg/g) is the monolayer maximum sorption capacity, and  $K_L$  (L/mg) is the Langmuir affinity constant.  $K_F$  is the Freundlich affinity coefficient [(mg/g)/(mg/L)<sup>n</sup>], and  $n$  is the exponential coefficient.

### **Desorption tests**

Before leaching tests, the Hg-laden MoS<sub>2</sub> and AC samples were prepared by adding 20 mg/L Hg(II) with either 8 mg/L MoS<sub>2</sub> nanosheets or 1.67 g/L activated carbon. The Hg removal efficiency by MoS<sub>2</sub> nanosheets and AC were above 97%, indicating nearly complete anchoring of Hg ions by MoS<sub>2</sub> and AC. Desorption tests were performed by monitoring the Hg release from Hg-laden MoS<sub>2</sub> and AC samples in 20 mL simulated groundwater, 20 mL acid solution (0.23 mM H<sub>2</sub>SO<sub>4</sub> and 0.17 mM HNO<sub>3</sub>), or 20 mL 1 mM EDTA solution. The mixture of solution of H<sub>2</sub>SO<sub>4</sub> and HNO<sub>3</sub> was prepared at a mass ratio of 2:1 in DI water (pH = 3.2±0.1) to simulate the condition in which the samples are exposed to acidic rain (HJ/T 299-2007, China).<sup>2</sup> In all cases, the vials were sealed and continuously mixed on an end-over-end rotator at 60 rpm at room temperature (25±1 °C) for 1 d, 2 d, 4 d, and 7 d. The samples were filtered through the 0.22 μm PTFE filters and analyzed for Hg concentrations in the filtrates.

**Table S1.** Pseudo-first-order and pseudo-second-order models for simulating Hg sorption kinetics and the corresponding fitting parameters.

| Kinetic models      | Parameters                             |                            |                                          | $R^2$  |
|---------------------|----------------------------------------|----------------------------|------------------------------------------|--------|
| Pseudo-first-order  | $K_1$ ( $\text{h}^{-1}$ )<br>0.97±0.12 | $q_e$ (mg/g)<br>50.91±1.18 | $h_1 = K_1 q_e$ (mg/(g•h))<br>49.38      | 0.9698 |
| Pseudo-second-order | $K_2$ (g/(mg•h))<br>0.075±0.01         | $q_e$ (mg/g)<br>1250±0.63  | $h_2 = K_2 q_e^2$ (mg/(g•h))<br>117187.5 | 0.9999 |

**Table S2.** Regression parameters of sorption isotherm data of Hg(II) onto MoS<sub>2</sub> nanosheets by Langmuir and Freundlich models.

| Water bodies | Adsorption isotherm | Parameters                                    |                    | $R^2$  |
|--------------|---------------------|-----------------------------------------------|--------------------|--------|
| Groundwater  | Langmuir            | $q_m$ (mg/g)<br>6288                          | $b$ (L/mg)<br>1.82 | 0.9801 |
|              | Freundlich          | $K_F$ , (mg/g)/(mg/L) <sup>n</sup><br>3494.11 | $n$<br>0.23        | 0.9145 |
| DI Water     | Langmuir            | $q_m$ (mg/g)<br>4042.85                       | $b$ (L/mg)<br>0.41 | 0.9592 |
|              | Freundlich          | $K_F$ , (mg/g)/(mg/L) <sup>n</sup><br>1893.86 | $n$<br>0.21        | 0.9883 |

**Table S3.** Comparison of the Hg removal capacities of different materials.

| Adsorbent                         | Material Type                                        | Capacity (mg/g) | Reference |
|-----------------------------------|------------------------------------------------------|-----------------|-----------|
| Other Materials                   | FeS                                                  | 3086.4          | 3         |
|                                   | Indium-modified ZVI                                  | 220.9           | 4         |
|                                   | Biochar                                              | 57.8            | 5         |
|                                   | SnS <sub>2</sub>                                     | 185.83          | 6         |
|                                   | GO                                                   | 255.1           | 6         |
|                                   | SGO/Fe-Mn                                            | 233.17          | 7         |
|                                   | Multilayered Ti <sub>3</sub> C <sub>2</sub> Ox Mxene | 4806            | 8         |
| MoS <sub>2</sub> -based Materials | d-MoS <sub>2</sub> /Fe <sub>3</sub> O <sub>4</sub>   | 425.5           | 9         |
|                                   | MoS <sub>2</sub> -HNR                                | ~1991           | 10        |
|                                   | Petal-like MoS <sub>2</sub>                          | 289             | 11        |
|                                   | □P-PVDF/MoS <sub>2</sub>                             | 578             | 12        |
|                                   | MoS <sub>2</sub> /MMT                                | 1836            | 13        |
|                                   | 2D-MoS <sub>2</sub>                                  | 6288            | Our work  |

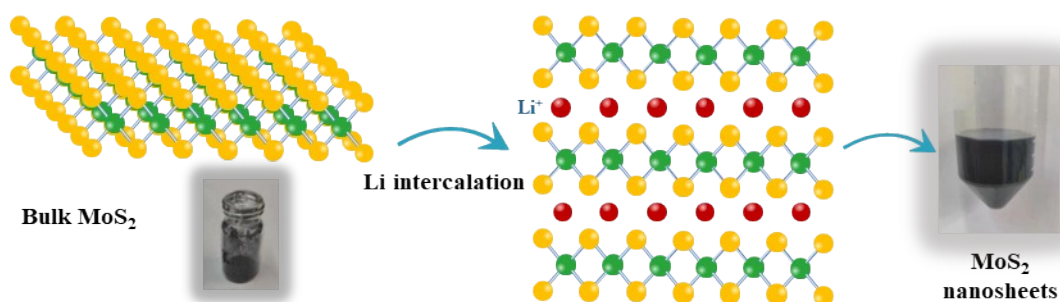

**Figure S1.** Schematic illustration of the chemical exfoliation of bulk MoS<sub>2</sub>.

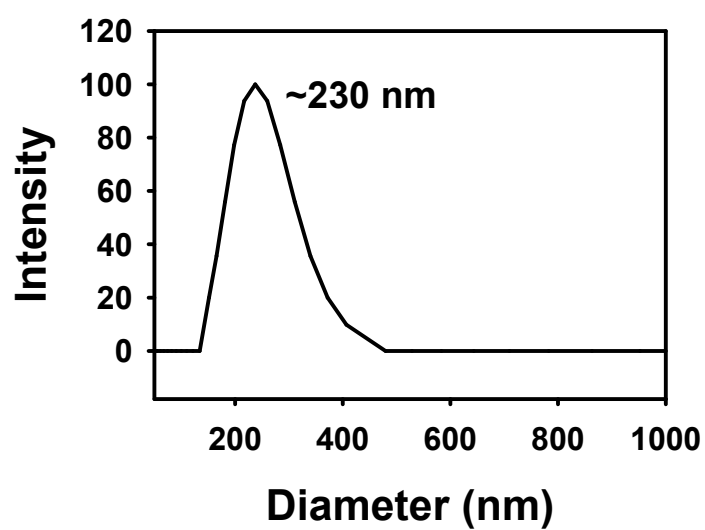

**Figure S2.** Particle size distribution of as-exfoliated MoS<sub>2</sub> nanosheets measured by dynamic light scattering.

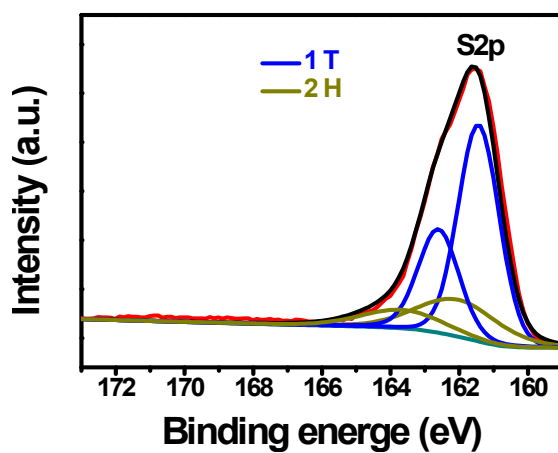

**Figure S3.** XPS S 2p spectra of as-prepared MoS<sub>2</sub> nanosheets.

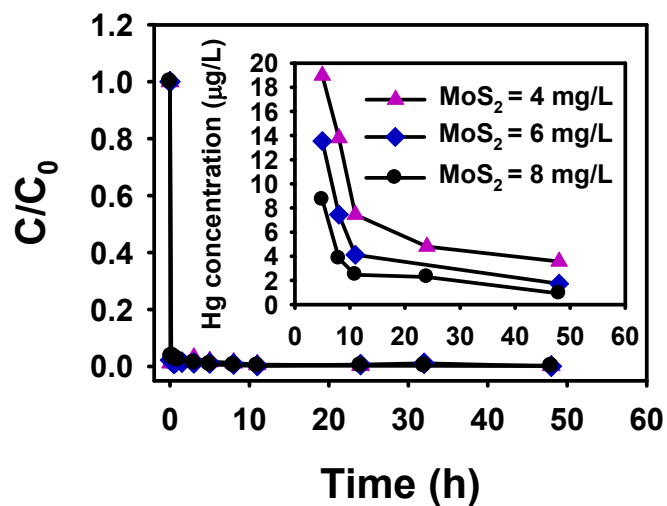

Figure S4. Hg uptake kinetics by MoS<sub>2</sub> nanosheets in groundwater.

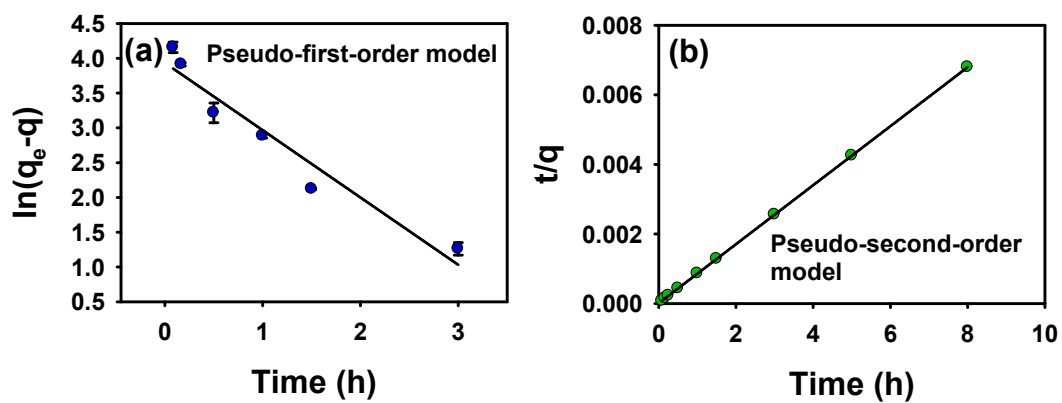

Figure S5. Hg uptake kinetics by MoS<sub>2</sub> nanosheets fitted with (a) pseudo-first-order model and (b) pseudo-second-order model.

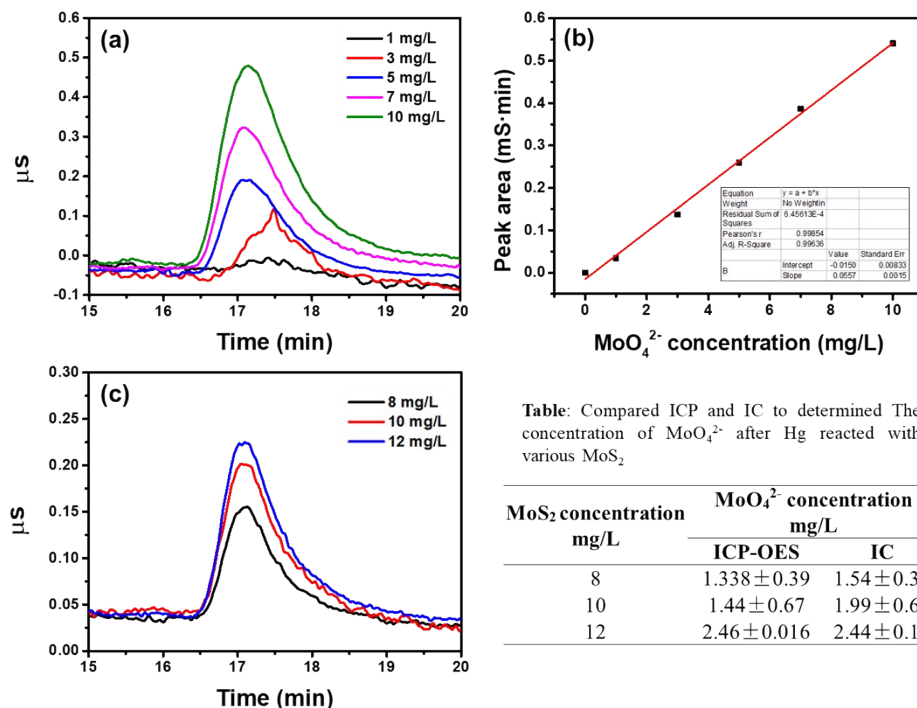

**Figure S6.** Determination of  $\text{MoO}_4^{2-}$  in solution by Ion Chromatography. (a) Chromatograms of different concentration of  $\text{MoO}_4^{2-}$  by the addition of sodium molybdate. (b) Linear relationship between  $\text{MoO}_4^{2-}$  concentration and peak area. (c) Ion Chromatograms of soluble Mo species after the reactions of Hg with  $\text{MoS}_2$  at various concentrations. The concentrations of  $\text{MoO}_4^{2-}$  determined by ICP-OES and IC exhibited a good agreement (the inserted table).

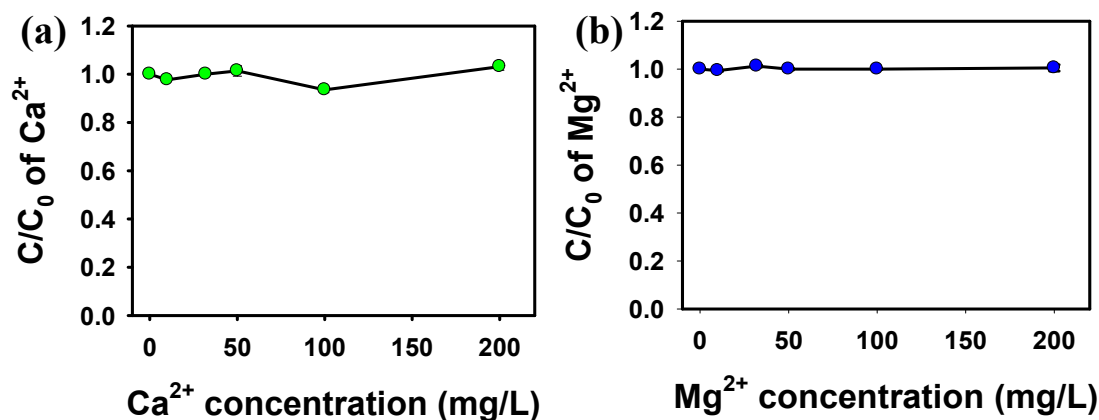

**Figure S7.** The ratios of the remaining to the initial concentrations of  $\text{Ca}^{2+}$  (a) and  $\text{Mg}^{2+}$  (b) in the presence of  $\text{MoS}_2$  nanosheets.



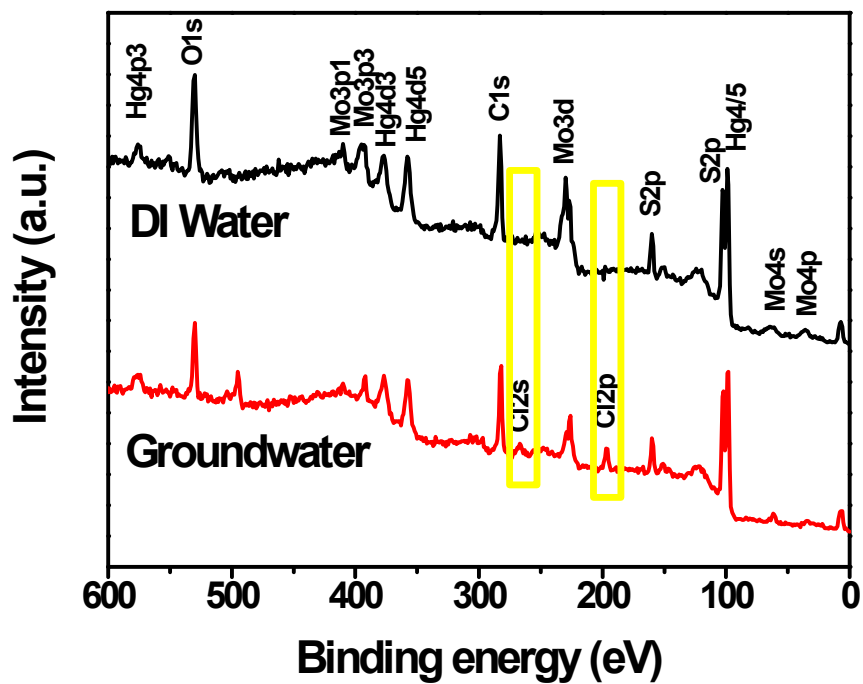

**Figure S8.** The XPS survey scan spectra of Hg-laden MoS<sub>2</sub> formed in DI water and Groundwater.

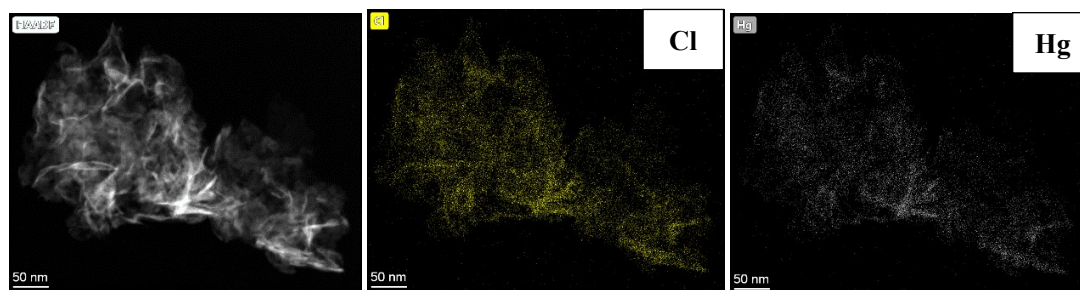

**Figure S9.** TEM images and EDS-mapping of Hg-laden MoS<sub>2</sub> nanosheets in groundwater.

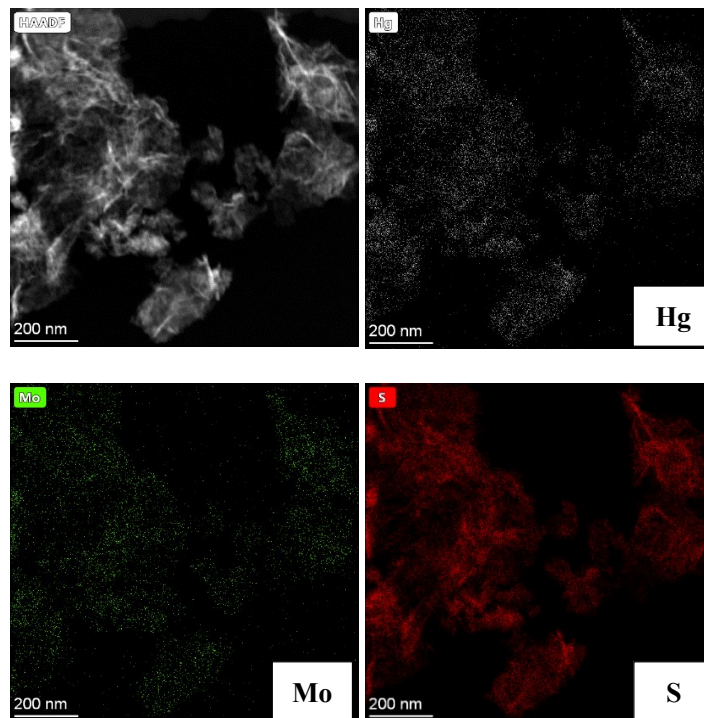

**Figure S10.** TEM images and EDS-mapping of Hg-laden MoS<sub>2</sub> nanosheets in DI water.

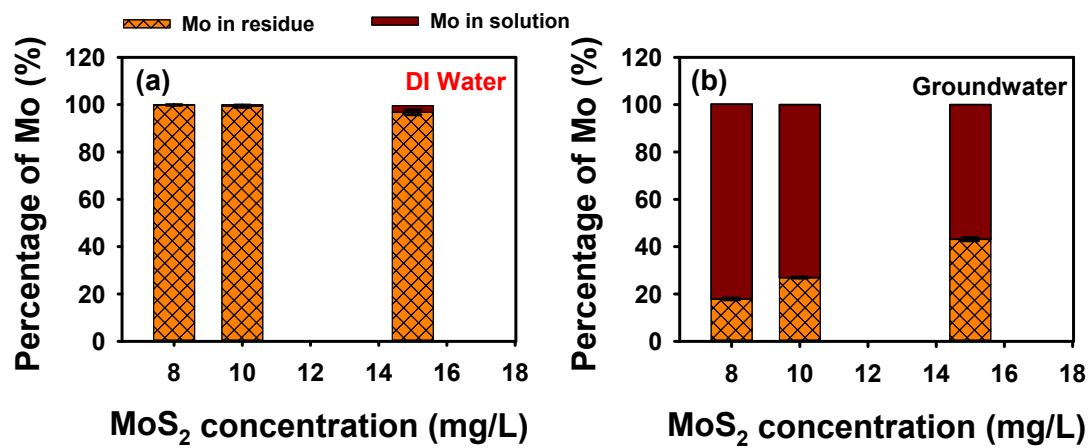

**Figure S11.** Mass distributions of Mo species in (a) DI water and (b) groundwater.

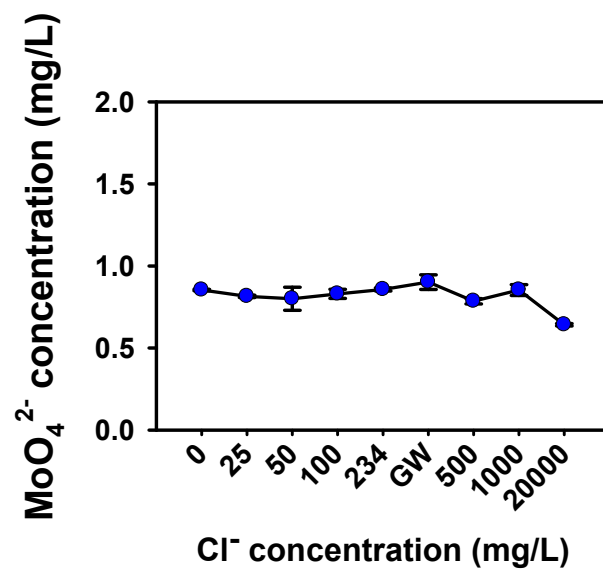

**Figure S12.** Oxidation of MoS<sub>2</sub> nanosheets in presence of Cl<sup>-</sup> at various concentrations.

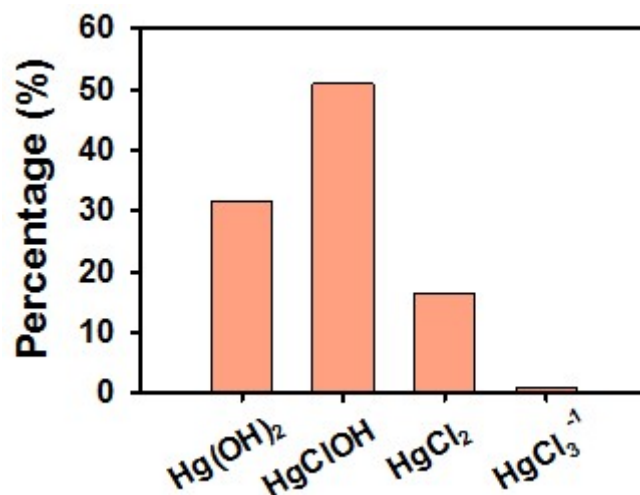

**Figure S13.** The percentage of Hg species in simulated groundwater using Visual MINTEQ (version 3.1) at pH = 8.0.

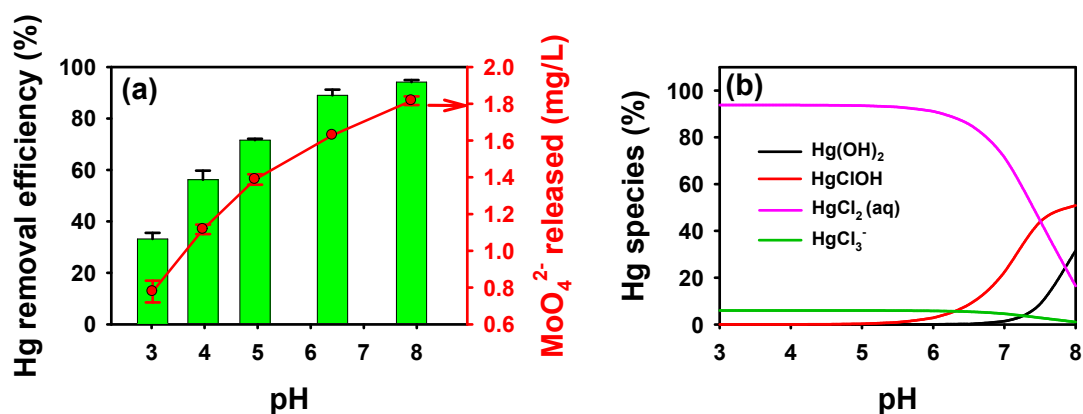

**Figure S14.** (a) Effects of pH on Hg removal efficiency by MoS<sub>2</sub>, Hg = 20 mg/L, MoS<sub>2</sub> = 4 mg/L. (b) Hg speciation as a function of pH determined by Visual MINTEQ.

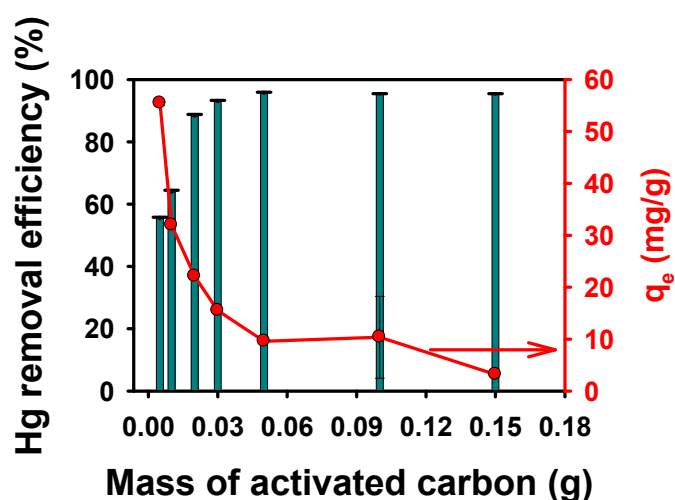

**Figure S15.** Hg uptake by AC in the groundwater. The mass of AC is 0–0.15 g, Hg concentration is 20 mg/L.

## Reference

- 1 Y. Huang, S. Xia, J. Lyu and J. Tang, Highly efficient removal of aqueous Hg<sup>2+</sup> and CH<sub>3</sub>Hg<sup>+</sup> by selective modification of biochar with 3-mercaptopropyltrimethoxysilane, *Chem. Eng. J.*, 2019, **360**, 1646-1655.
- 2 Y. Huang, M. Wang, Z. Li, Y. Gong and E. Y. Zeng, In situ remediation of mercury-contaminated soil using thiol-functionalized graphene oxide/Fe-Mn composite, *J. Hazard. Mater.*, 2019, **373**, 783-790.
- 3 M. Wang, Y. Li, D. Zhao, L. Zhuang, G. Yang and Y. Gong, Immobilization of mercury by iron sulfide nanoparticles alters mercury speciation and microbial methylation in contaminated groundwater, *Chem. Eng. J.*, 2020, **381**, 122664.
- 4 G. H. Qasim, S. Lee, W. Lee and S. Han, Reduction and removal of aqueous Hg(II) using indium-modified zero-valent iron particles, *Appl. Catal B: Environ.*, 2020, **277**, 119198.
- 5 J. H. Park, J. J. Wang, B. Zhou, J. E. R. Mikhael and R. D. DeLaune, Removing mercury

- from aqueous solution using sulfurized biochar and associated mechanisms, *Environ. Pollut.*, 2019, **244**, 627-635.
- 6 E. Rathore and K. Biswas, Selective and ppb level removal of Hg(II) from water: synergistic role of graphene oxide and SnS<sub>2</sub>, *J. Mater. Chem. A.*, 2018, **6**, 13142-13152.
- 7 Y. Huang, Y. Gong, J. Tang and S. Xia, Effective removal of inorganic mercury and methylmercury from aqueous solution using novel thiol-functionalized graphene oxide/Fe-Mn composite, *J. Hazard. Mater.*, 2019, **366**, 130-139.
- 8 K. Fu, X. Liu, D. Yu, J. Luo, Z. Wang and J. C. Crittenden, Highly Efficient and Selective Hg(II) Removal from Water Using Multilayered Ti<sub>3</sub>C<sub>2</sub>O<sub>x</sub> MXene via Adsorption Coupled with Catalytic Reduction Mechanism, *Environ. Sci. Technol.*, 2020, **54**, 16212-16220.
- 9 Y. Song, M. Lu, B. Huang, D. Wang, G. Wang and L. Zhou, Decoration of defective MoS<sub>2</sub> nanosheets with Fe<sub>3</sub>O<sub>4</sub> nanoparticles as superior magnetic adsorbent for highly selective and efficient mercury ions (Hg<sup>2+</sup>) removal, *J. Alloys. Comps.*, 2018, **737**, 113-121.
- 10 A. N. Jayadharan Salini, A. Ramachandran, S. Sadasivakurup and S. K. Yesodha, Versatile MoS<sub>2</sub> hollow nanoroses for a quick-witted removal of Hg (II), Pb (II) and Ag (I) from water and the mechanism: Affinity or Electrochemistry?, *Appl. Mater. Today.*, 2020, **20**, 100642.
- 11 R. Pirarath, P. Shivashanmugam, A. Syed, A. M. Elgorban, S. Anandan and M. Ashokkumar, Mercury removal from aqueous solution using petal-like MoS<sub>2</sub> nanosheets, *Front. Environ. Sci. Eng.*, 2021, **15**.
- 12 X. Zhao, J. Li, S. Mu, W. He, D. Zhang, X. Wu, C. Wang and H. Zeng, Efficient removal of mercury ions with MoS<sub>2</sub>-nanosheet-decorated PVDF composite adsorption membrane, *Environ. Pollut.*, 2021, **268**, 115705.
- 13 E. D. A. Mário, C. Liu, C. I. Ezugwu, S. Mao, F. Jia and S. Song, Molybdenum disulfide/montmorillonite composite as a highly efficient adsorbent for mercury removal from wastewater, *Appl Clay Sci.*, 2020, **184**, 105370.
